# Supplementary material for: Chiral 1-phenylethylamine-derived phosphine-phosphoramidite ligands for highly enantioselective Rh-catalyzed hydrogenation of β-(acylamino)acrylates: significant effect of substituents on 3,3′-positions of binaphthyl moiety
Source: Royal Society of Chemistry journal article supplement (doi:10.1039/c000268b), 2010-01-01
Supplement: c000268b.pdf [file c000268b.pdf]

# Chiral 1-phenylethylamine-derived phosphine-phosphoramidite ligands for highly enantioselective Rh-catalyzed hydrogenation of $\beta$ -(acylamino)acrylates: significant effect of substituents on 3,3'-positions of binaphthyl moiety

*Xiao-Mao Zhou, Jia-Di Huang, Li-Bin Luo, Chen-Lu Zhang, Xiang-Ping Hu\* and Zhuo Zheng*

## Supporting Information

|                                                                              |    |
|------------------------------------------------------------------------------|----|
| General Methods.....                                                         | 2  |
| General procedure for preparation of phosphine-phosphoramidite ligand 2..... | 2  |
| General procedure for asymmetric hydrogenation.....                          | 3  |
| References.....                                                              | 3  |
| NMR spectra for 2a and 2b.....                                               | 4  |
| Ee-analysis for hydrogenation products 6a-k.....                             | 10 |

## General Methods.

All reactions and manipulations were performed in a nitrogen-filled glove box or under nitrogen using Schlenk techniques unless otherwise noted. All solvents were distilled under argon in the presence of the following desiccants: sodium-benzophenone for diethyl ether (Et<sub>2</sub>O), tetrahydrofuran (THF) and toluene, CaH<sub>2</sub> for dichloromethane (CH<sub>2</sub>Cl<sub>2</sub>). (*S<sub>c</sub>*)-DPPNHCH<sub>3</sub> **3**<sup>1</sup> and (*S*)-**4**<sup>2</sup> were prepared according to the literature methods. NMR spectra were obtained on Bruker DRX 400 spectrometers. <sup>31</sup>P NMR shifts were referenced to external 85% H<sub>3</sub>PO<sub>4</sub>, while <sup>13</sup>C and <sup>1</sup>H NMR shifts were referenced to the residual signals of deuterated solvents. Enantiomeric excesses for **6a-e** and **6i-k** were determined by GC performed with HP4890 on a chiral select 1000 capillary column. Enantiomeric excesses for **6f-h** were determined by HPLC performed with an Agilent 1100 series instrument on a chiralpak AD-H column.<sup>3</sup> Optical rotations were measured on a JASCO P-1020 high sensitive polarimeter.

### General procedure for preparation of phosphine-phosphoramidite ligand **2**.

(*S<sub>a</sub>*)-4-chloro-3,5-dioxa-4-phosphacyclohepta[2,1- $\alpha'$ ;3,4- $\alpha'$ ]dinaphthalene (1.0 mmol) was dissolved in 4.0 mL of dried toluene, and cooled to 0 °C. A solution of (*S<sub>c</sub>*)-DPPNHCH<sub>3</sub> **3** (319 mg, 1.0 mmol) and Et<sub>3</sub>N (0.38 mL) in 4.0 mL of toluene was added to the above solution within 30 minutes. The resulting mixture was left stirring at room temperature overnight. After filtering off the precipitate, the filtrate was collected and concentrated under reduced pressure. The residue was purified by column chromatography (silica, hexanes/Et<sub>3</sub>N = 10/1) to give 548 mg (82.9% yield) of (*S<sub>c</sub>,S<sub>a</sub>*)-**2a**, as a white solid. M.p.: 136-138°C; [ $\alpha$ ]<sub>D</sub><sup>25</sup> = +67.2 (c 0.42, ClCH<sub>2</sub>CH<sub>2</sub>Cl); <sup>1</sup>H NMR (400 MHz, CDCl<sub>3</sub>):  $\delta$  1.58-1.60 (m, 3H), 2.05-2.06 (m, 3H), 2.44 (s, 1H), 2.60 (s, 3H), 5.28-5.30 (m, 1H), 7.12-7.80 (m, 24H); <sup>31</sup>P NMR (162 MHz, CDCl<sub>3</sub>):  $\delta$  -17.4, 144.7; <sup>13</sup>C NMR (100 MHz, CDCl<sub>3</sub>):  $\delta$  17.9, 21.8, 29.4, 56.5, 124.3, 124.9, 126.9, 127.1, 127.2, 128.5, 128.6, 128.7, 128.9, 129.0, 129.6, 133.8, 134.0, 148.9, 150.1; HR-MS (EI): m/z = 661.2310, calcd. for C<sub>43</sub>H<sub>37</sub>NO<sub>2</sub>P<sub>2</sub> {M<sup>+</sup>}: 661.2300.

In a similar procedure, (*S<sub>c</sub>,S<sub>a</sub>*)-**2b** in 88.1% yield as a white solid. M.p.: 142-144°C; [ $\alpha$ ]<sub>D</sub><sup>25</sup> = +275 (c 0.23, ClCH<sub>2</sub>CH<sub>2</sub>Cl); <sup>1</sup>H NMR (400 MHz, CDCl<sub>3</sub>):  $\delta$  1.32 (d, 3H), 1.79 (s, 3H), 4.77 (m, 1H), 6.76-7.99 (m, 34H); <sup>31</sup>P NMR (CDCl<sub>3</sub>):  $\delta$  -17.53, 148.20; <sup>13</sup>C NMR:  $\delta$  21.7, 30.6, 57.1, 123.5, 125.9, 127.0, 127.1, 127.3, 127.5, 128.1, 128.3, 128.4, 128.5, 128.6, 130.0, 130.1, 133.6, 133.8, 134.0, 138.5, 147.3, 148.0; HR-MS (EI): m/z = 785.2619, calcd. for C<sub>53</sub>H<sub>41</sub>NO<sub>2</sub>P<sub>2</sub> {M<sup>+</sup>}: 785.2613.

## General procedure for asymmetric hydrogenation

In a nitrogen-filled glovebox,  $[\text{Rh}(\text{COD})_2]\text{BF}_4$  (1.0 mg, 0.0025 mmol) and ( $S_c, S_a$ )-**2b** (1.8 mg, 0.00275 mmol) were dissolved in degassed MeOH (1 mL) in a 5 mL of vial. After stirring at room temperature for 15 minutes, a solution of (*Z*)- $\beta$ -phenyl- $\beta$ -(acetylamino)acrylate **5a** (58 mg, 0.25 mmol, S/C 100:1) in 1 mL of degassed MeOH was added. The resulting mixture was transferred to an autoclave, which was then charged with  $\text{H}_2$  (10 bar). The hydrogenation was performed at room temperature for 24 h. After carefully releasing the hydrogen gas, the reaction mixture was concentrated under reduced pressure. The residue was purified through a plug of silica gel (eluting with a mixture of hexanes/EtOAc, 2/1) to afford **6a**. The enantiomeric excess was determined by chiral GC on chiral select 1000 (30 m x 0.25 mm).

## References

1. J.-D. Huang, X.-P. Hu, Z.C. Duan, Q.-H. Zeng, S.-B. Yu, J. Deng, D.-Y. Wang and Z. Zheng, *Org. Lett.*, 2006, **8**, 4367.
2. (a) T. R. Wu, L. Shen and J. M. Chong, *Org. Lett.*, 2004, **6**, 2701; (b) G. Franciò, C. G. Arena, F. Faraone, C. Graiff, M. Lanfranchi and A. Tiripicchio, *Eur. J. Inorg. Chem.*, 1999, 1219.
3. (a) G. Zhu, Z. Chen, X. Zhang, *J. Org. Chem.*, 1999, **64**, 6907; (b) W. Tang, W. Wang, Y. Chi, X. Zhang, *Angew. Chem. Int. Ed.*, 2003, **42**, 3509.

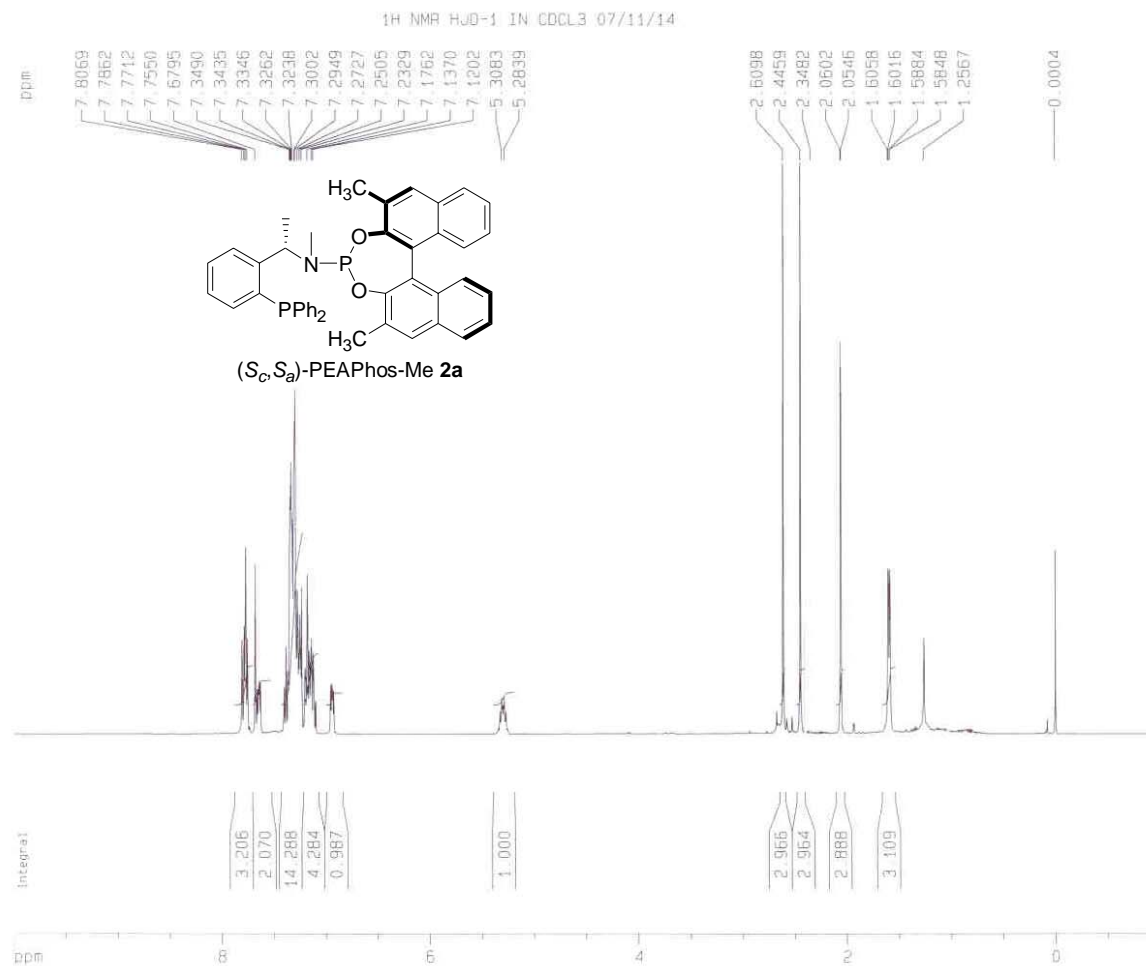

Current Data File: *pea2a*  
 NAME: *pea2a*  
 EXPNO: 0593  
 PROCNO: *CH3*

F2 - Acquisition Parameters  
 Date\_: 20071114  
 Time: 13.58  
 INSTRUM: drx400  
 PROBHD: 5 mm PABBO BB-  
 PULPRDG: zg  
 TD: 32768  
 SOLVENT: CDCl<sub>3</sub>  
 NS: 8  
 DS: 0  
 SWH: 8012.820 Hz  
 FIDRES: 0.244532 Hz  
 AQ: 2.0447731 sec  
 RG: 71.8  
 DW: 62.400 usec  
 DE: 6.00 usec  
 TE: 296.2 K  
 D1: 1.00000000 sec  
 MCREST: 0.00000000 sec  
 MCWPK: 0.01500000 sec

==== CHANNEL f1 =====  
 NUC1: <sup>1</sup>H  
 P1: 8.20 usec  
 PL1: 5.00 dB  
 SFO1: 400.1332521 MHz

F2 - Processing parameters  
 SI: 32768  
 SF: -400.1300279 MHz  
 WDW: GM  
 SSB: 0  
 LB: -0.50 Hz  
 GB: 0.1  
 PC: 1.40

1D NMR plot parameters  
 CX: 20.00 cm  
 CY: 10.00 cm  
 F1P: 10.000 ppm  
 F1: 4001.30 Hz  
 F2P: -1.000 ppm  
 F2: -400.13 Hz  
 PPMCM: 0.55000 ppm/cm  
 HZCM: 220.07152 Hz/cm

<sup>1</sup>H NMR of (S<sub>c</sub>,S<sub>a</sub>)-PEAPhos-Me **2a**

<sup>31</sup>P NMR HJ0-1 IN CDCl<sub>3</sub> 07/11/14

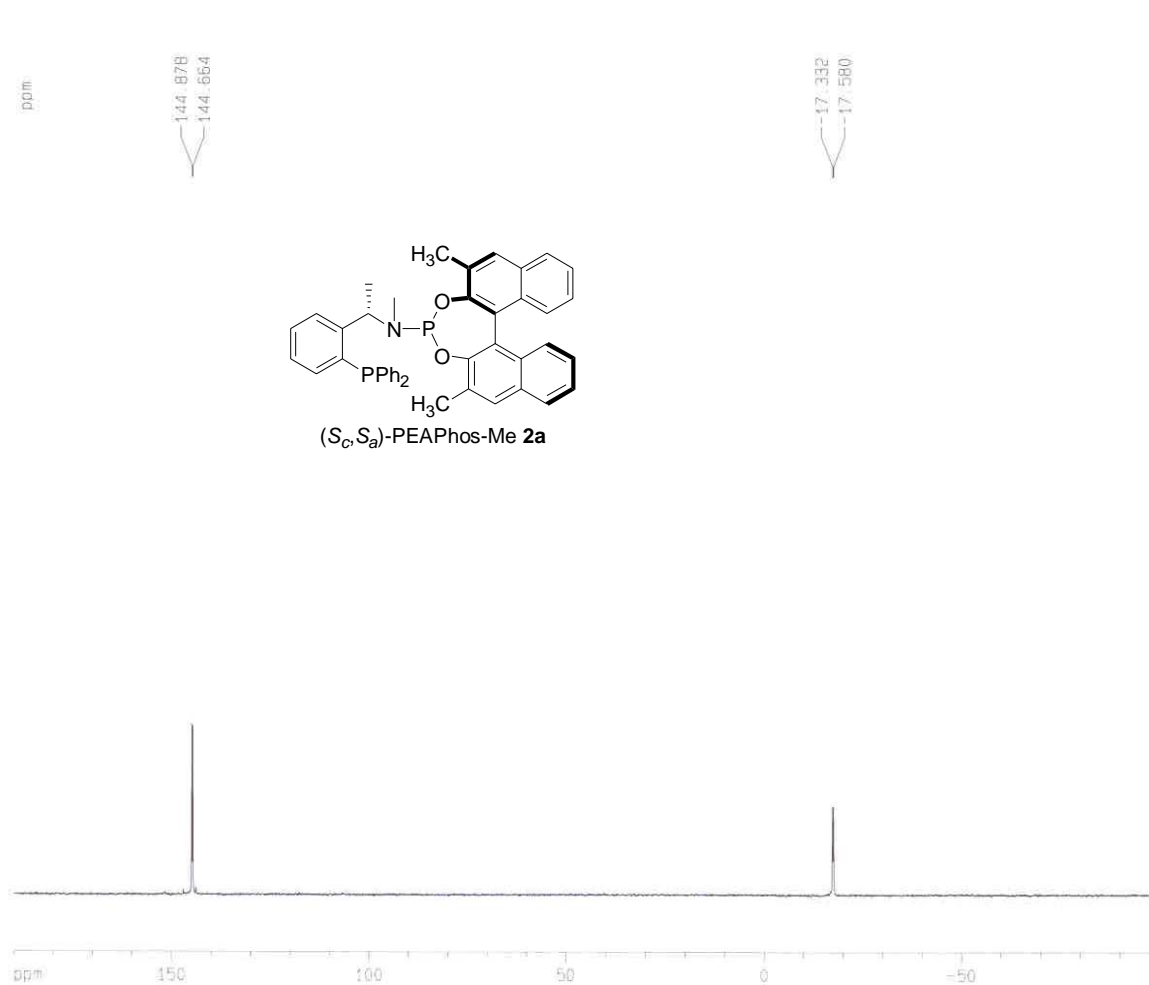

Current Data Parameters  
 NAME  
 EXPNS 580  
 PROCNO  
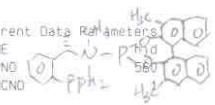

F2 - Acquisition Parameters  
 Date\_ 20071114  
 Time 14.00  
 INSTRUM drx400  
 PROBHD 5 mm PABBO BB-  
 PULPROG zg  
 TD 32768  
 SOLVENT CDCl<sub>3</sub>  
 NS 29  
 DS 0  
 SWH 46543.688 Hz  
 FIDRES 1.481436 Hz  
 AQ 0.3375604 sec  
 RG 4096  
 DW 10.300 usec  
 DE 6.00 usec  
 TE 296.2 K  
 D1 2.00000000 sec  
 MCREST 0.00000000 sec  
 MCWRR 0.01500000 sec

===== CHANNEL f1 =====  
 NUC1 <sup>31</sup>P  
 P1 8.00 usec  
 PL 0.00 dB  
 SF01 161.9820520 MHz

F2 - Processing parameters  
 SI 16384  
 SF 161.9755337 MHz  
 WDW EM  
 SSB 0  
 LB 5.00 Hz  
 GB 0  
 PC 1.40

1D NMR plot parameters  
 CX 20.00 cm  
 CY 3.00 cm  
 F1P 190.000 ppm  
 F1 30775.35 Hz  
 F2P -100.000 ppm  
 F2 -16197.55 Hz  
 PPMCM 14.50000 ppm/cm  
 HZCM 2348.64526 Hz/cm

<sup>31</sup>P NMR of (*S<sub>c</sub>*,*S<sub>a</sub>*)-PEAphos-Me **2a**

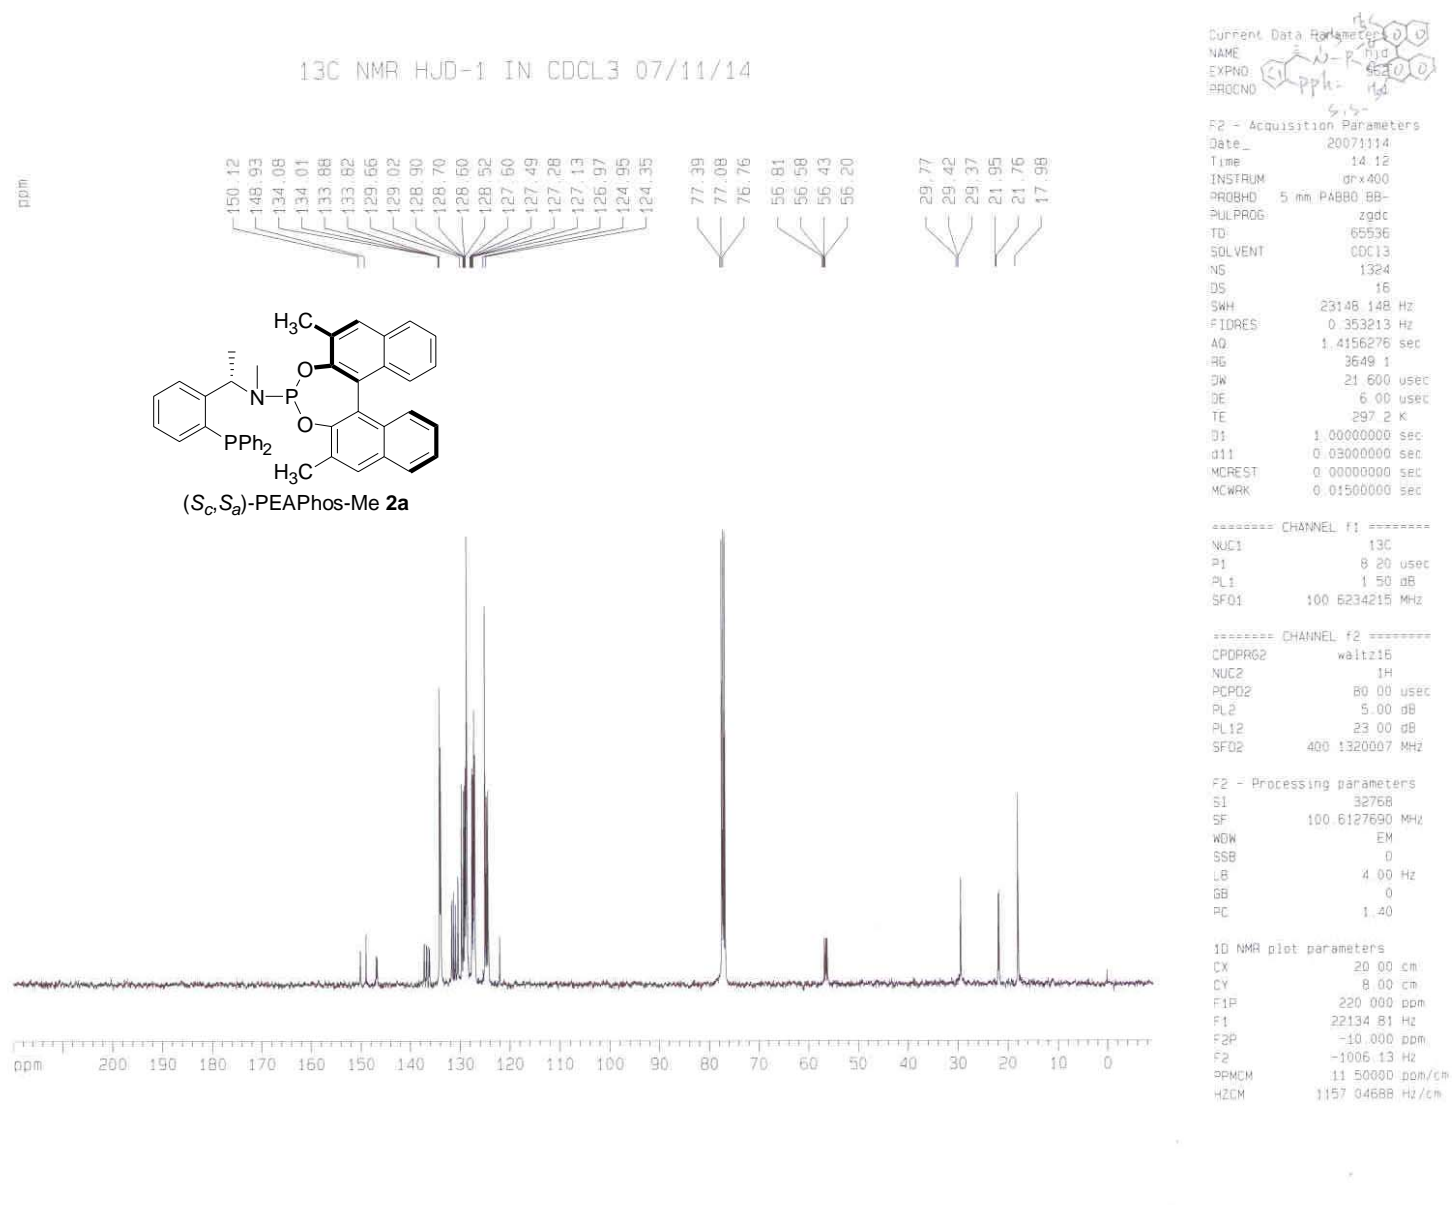

<sup>13</sup>C NMR of (S<sub>c</sub>,S<sub>a</sub>)-PEAphos-Me 2a

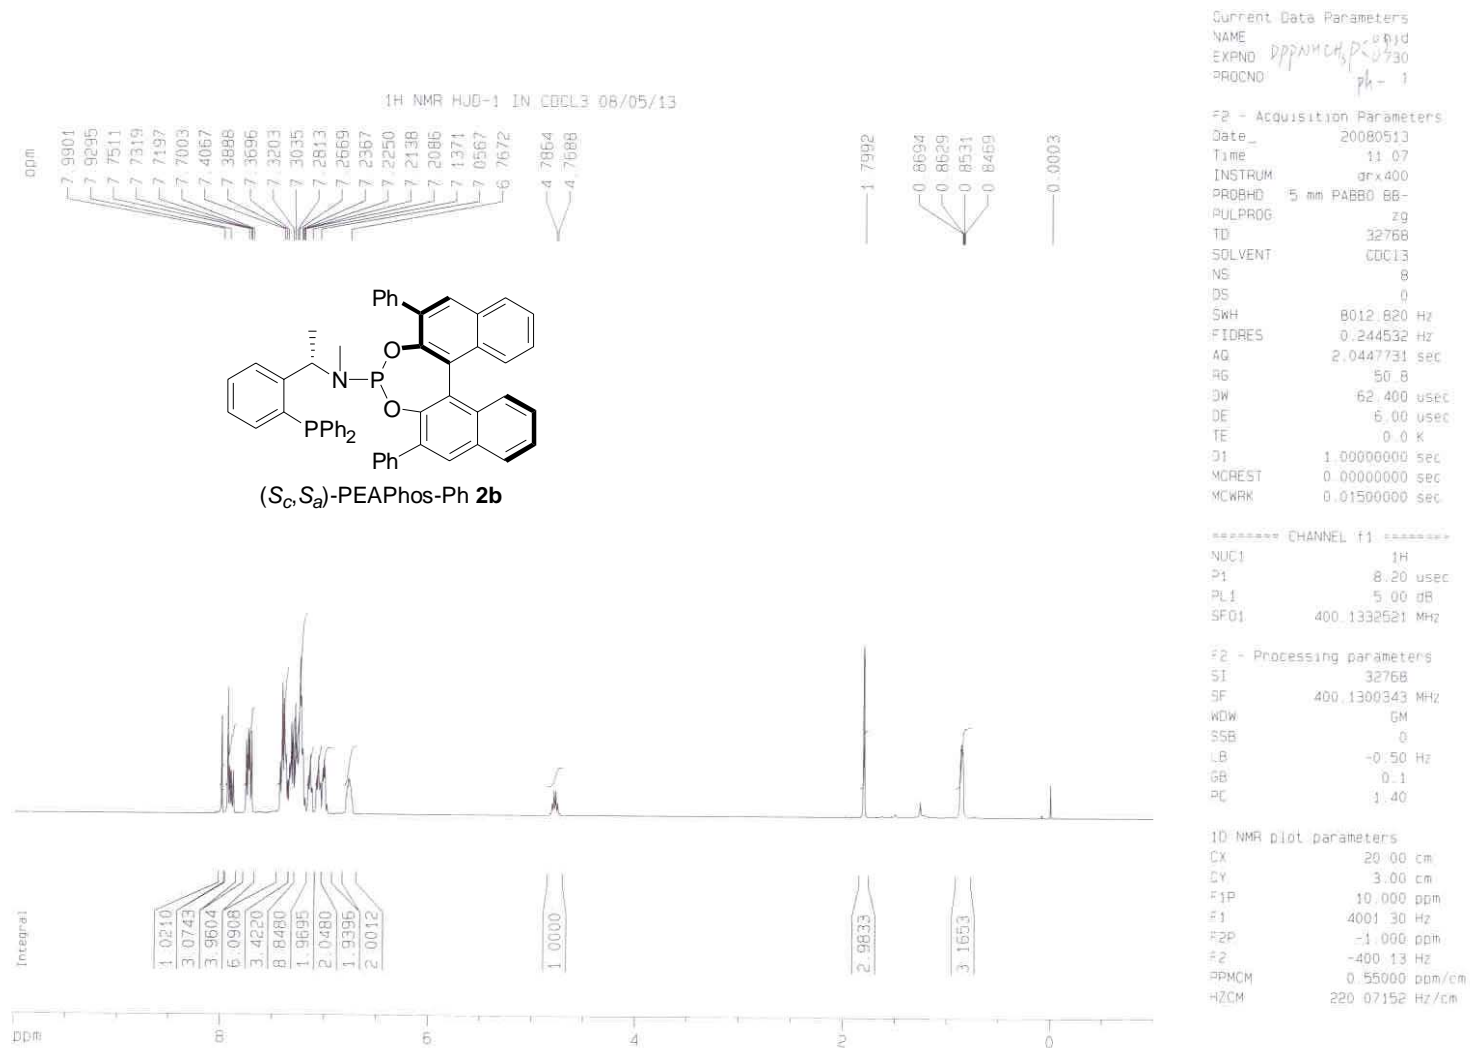

<sup>1</sup>H NMR of (S<sub>c</sub>,S<sub>a</sub>)-PEAphos-Ph 2b

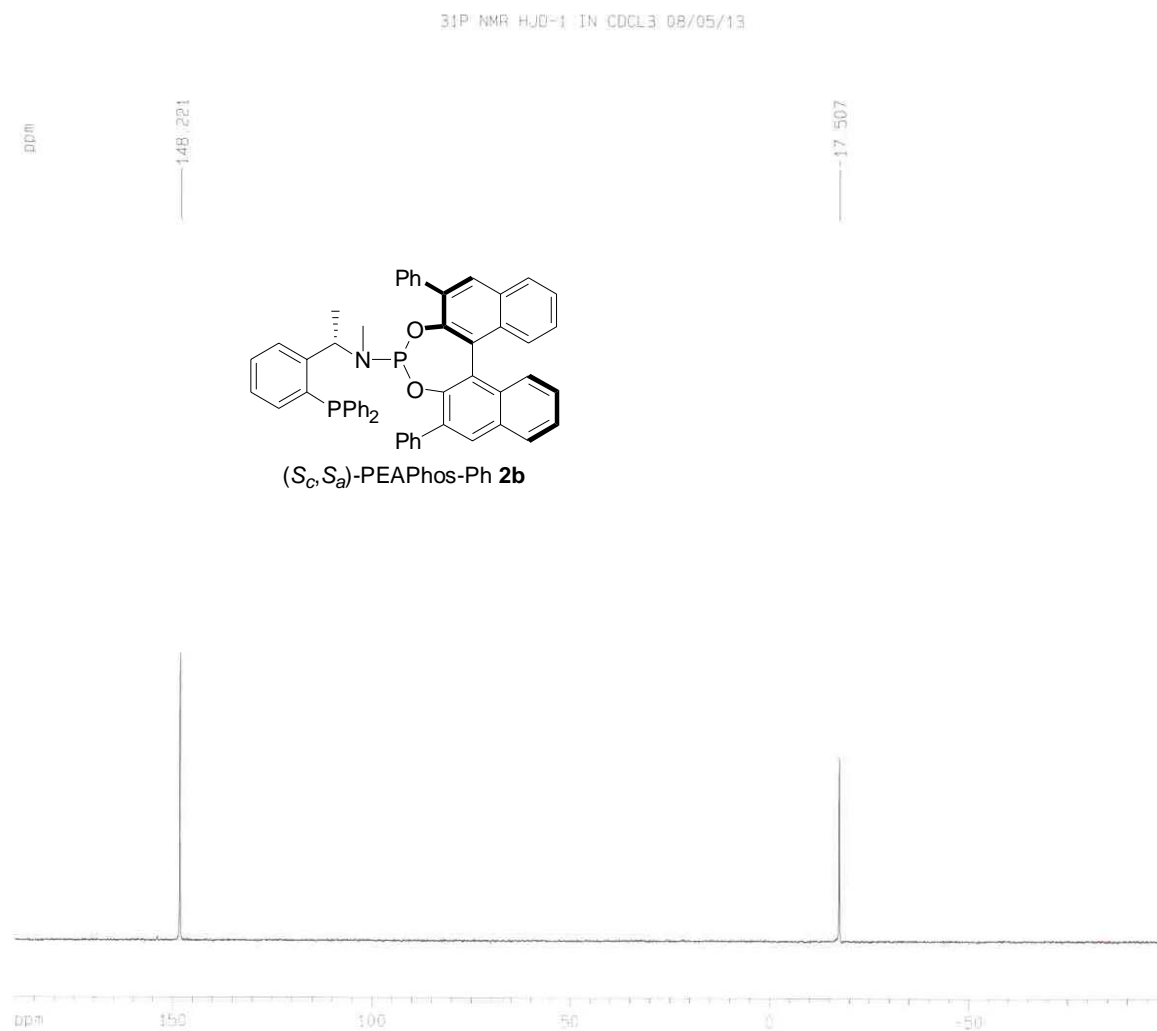

Current Data Parameters  
 NAME pppmch<sub>3</sub> P<sub>2</sub> O<sub>2</sub> Ph-...  
 EXPNO 1  
 PROCNO 1

F2 - Acquisition Parameters  
 Date\_ 20080513  
 Time 11.09  
 INSTRUM drx400  
 PROBHD 5 mm PABBO BB-  
 PULPROG zg  
 TD 32768  
 SOLVENT CDCl<sub>3</sub>  
 NS 22  
 DS 0  
 SWH 48543.688 Hz  
 FIDRES 1.481436 Hz  
 AQ 0.3375604 sec  
 RG 3649.1  
 DW 10.300 usec  
 DE 6.00 usec  
 TE 0.0 K  
 D1 2.00000000 sec  
 MCREST 0.00000000 sec  
 MCWRR 0.01500000 sec

===== CHANNEL f1 =====  
 NUC1 <sup>31</sup>P  
 P1 8.00 usec  
 PL1 0.00 dB  
 SFO1 161.9820520 MHz

F2 - Processing parameters  
 SI 16384  
 SF 161.9755337 MHz  
 WDW EM  
 SSB 0  
 LB 5.00 Hz  
 GB 0  
 PC 1.40

1D NMR plot parameters  
 CX 20.00 cm  
 CY 5.00 cm  
 F1P 190.000 ppm  
 F1 -30775.35 Hz  
 F2P -100.000 ppm  
 F2 -16197.55 Hz  
 PPMCM 14.50000 ppm/cm  
 HZCM 2348.64526 Hz/cm

<sup>31</sup>P NMR of (S<sub>c</sub>,S<sub>a</sub>)-PEAphos-Ph **2b**



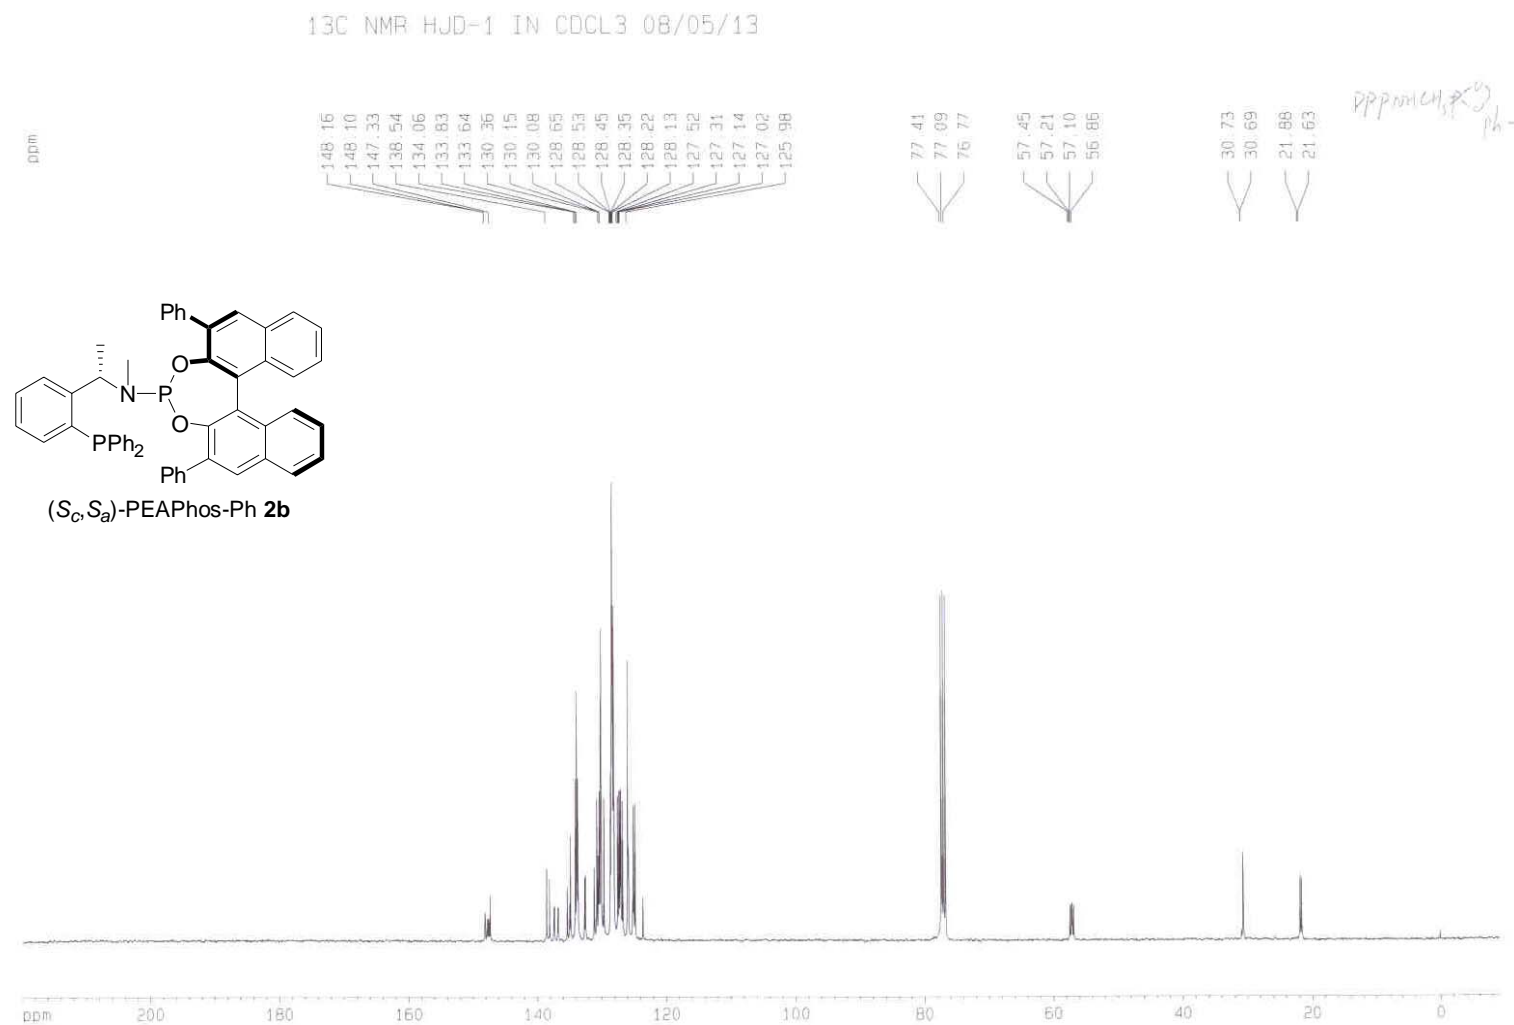

$^{13}\text{C}$  NMR of  $(S,S)$ -PEAphos-Ph **2b**

Data File C:\HPCHEM\1\DATA\HJD\07122100.D

Sample Name: xxt

=====  
 Injection Date : 12/22/2007 10:38:20 PM  
 Sample Name : xxt Location : Vial 1  
 Acq. Operator : hjd Inj Volume : Manually  
 Acq. Method : C:\HPCHEM\1\METHODS\DEF GC1.M  
 Last changed : 12/22/2007 8:45:19 PM by hjd  
 (modified after loading)  
 Analysis Method : C:\HPCHEM\1\METHODS\DEF GC1.M  
 Last changed : 12/25/2009 11:19:23 PM by hcj  
 (modified after loading)  
 =====

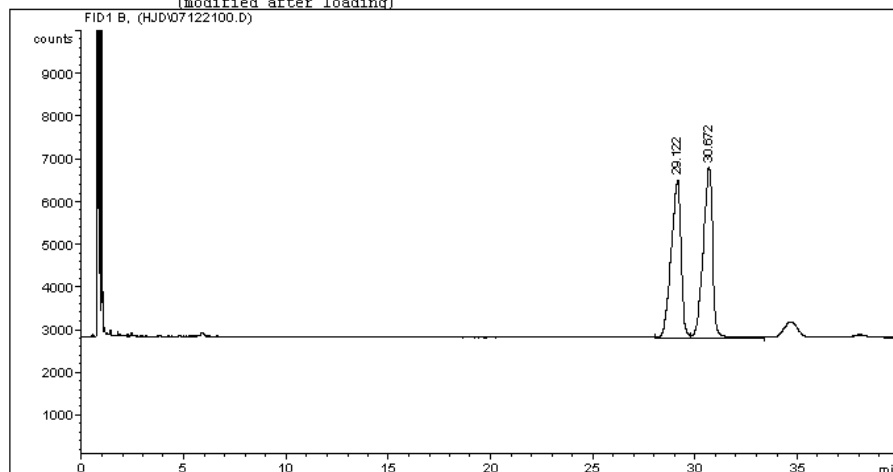

=====  
 Area Percent Report  
 =====  
 Sorted By : Signal  
 Multiplier : 1.0000  
 Dilution : 1.0000

Signal 1: FID1 B,

| Peak # | RetTime [min] | Type | Width [min] | Area counts*s | Height [counts] | Area %   |
|--------|---------------|------|-------------|---------------|-----------------|----------|
| 1      | 29.122        | VV   | 0.5240      | 1.25613e5     | 3700.47119      | 49.22835 |
| 2      | 30.672        | VV   | 0.5061      | 1.29551e5     | 3997.09595      | 50.77165 |

Totals : 2.55165e5 7697.56714

Results obtained with enhanced integrator!

\*\*\* End of Report \*\*\*

Instrument 1 12/25/2009 11:27:34 PM hcj

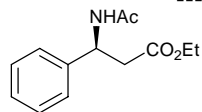

6a

Page 1 of 1

Data File C:\HPCHEM\1\DATA\HJD\07122108.D

Sample Name: 1125-8

=====  
 Injection Date : 12/23/2007 9:00:17 AM  
 Sample Name : 1125-8 Location : Vial 1  
 Acq. Operator : hjd Inj Volume : Manually  
 Acq. Method : C:\HPCHEM\1\METHODS\DEF GC1.M  
 Last changed : 12/23/2007 2:06:28 AM by hjd  
 (modified after loading)  
 Analysis Method : C:\HPCHEM\1\METHODS\DEF GC1.M  
 Last changed : 12/25/2009 11:34:46 PM by hcj  
 (modified after loading)  
 =====

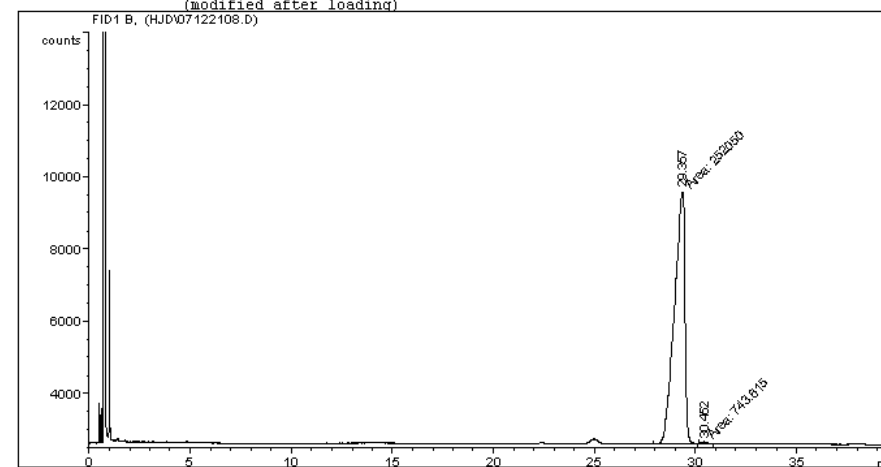

=====  
 Area Percent Report  
 =====  
 Sorted By : Signal  
 Multiplier : 1.0000  
 Dilution : 1.0000

Signal 1: FID1 B,

| Peak # | RetTime [min] | Type | Width [min] | Area counts*s | Height [counts] | Area %   |
|--------|---------------|------|-------------|---------------|-----------------|----------|
| 1      | 29.357        | MM   | 0.6008      | 2.52050e5     | 6992.18115      | 99.70584 |
| 2      | 30.462        | MM   | 0.3747      | 743.61511     | 33.07484        | 0.29416  |

Totals : 2.52794e5 7025.25599

Results obtained with enhanced integrator!

\*\*\* End of Report \*\*\*

Instrument 1 12/25/2009 11:35:13 PM hcj

Page 1 of 1

Data File C:\HPCHEM\1\DATA\HJD\08042213.D

Sample Name: 0420-lxxt

```

=====
Injection Date : 4/25/2008 3:16:58 AM
Sample Name    : 0420-lxxt                Location : Vial 1
Acq. Operator  : hjd                      Inj Volume : Manually

Acq. Method    : C:\HPCHEM\1\METHODS\DEF GC1.M
Last changed   : 4/24/2008 9:21:49 PM by hjd
                (modified after loading)
Analysis Method : C:\HPCHEM\1\METHODS\DEF GC1.M
Last changed   : 12/25/2009 9:23:35 PM by hcj
                (modified after loading)
    
```

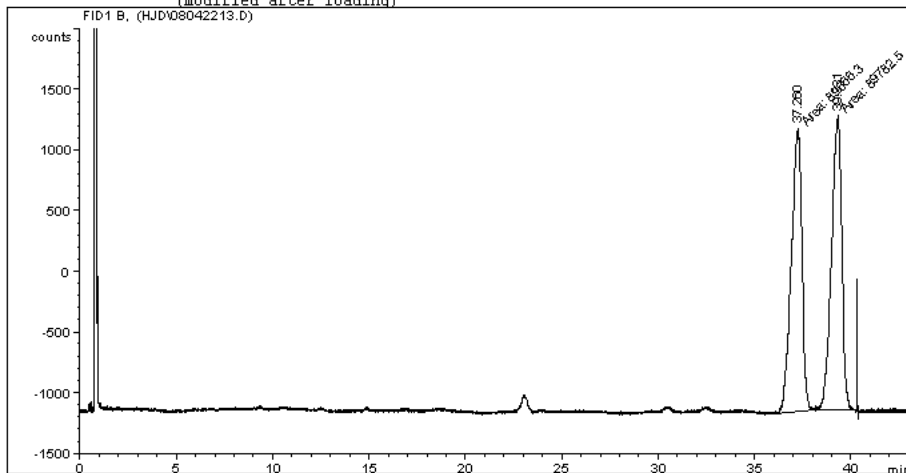

```

=====
Area Percent Report
=====
Sorted By      :      Signal
Multiplier     :      1.0000
Dilution       :      1.0000
    
```

```

Signal 1: FID1 B,
Peak RetTime Type Width Area Height Area
# [min] [min] [min] counts*s [counts] %
-----|-----|-----|-----|-----|-----|
1 37.260 MM 0.6392 8.96663e4 2337.83813 49.96760
2 39.331 MM 0.6158 8.97825e4 2430.00879 50.03240
Totals : 1.79449e5 4767.84692
    
```

Results obtained with enhanced integrator!

\*\*\* End of Report \*\*\*

Instrument 1 12/25/2009 9:28:51 PM hcj

Page 1 of 1

Data File C:\HPCHEM\1\DATA\HJD\08042201.D

Sample Name: 0420-1

```

=====
Injection Date : 4/22/2008 10:00:52 PM
Sample Name    : 0420-1                    Location : Vial 1
Acq. Operator  : hjd                      Inj Volume : Manually

Acq. Method    : C:\HPCHEM\1\METHODS\DEF GC1.M
Last changed   : 4/22/2008 8:58:28 PM by hjd
                (modified after loading)
Analysis Method : C:\HPCHEM\1\METHODS\DEF GC1.M
Last changed   : 12/25/2009 9:31:36 PM by hcj
                (modified after loading)
    
```

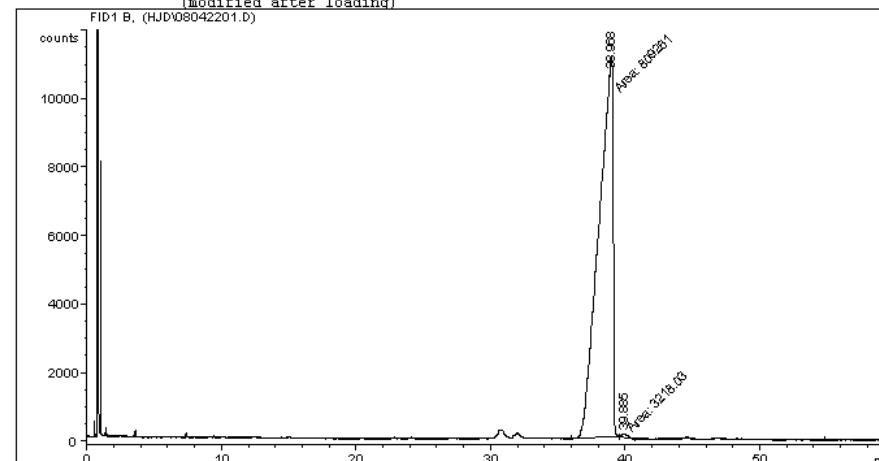

```

=====
Area Percent Report
=====
Sorted By      :      Signal
Multiplier     :      1.0000
Dilution       :      1.0000
    
```

```

Signal 1: FID1 B,
Peak RetTime Type Width Area Height Area
# [min] [min] [min] counts*s [counts] %
-----|-----|-----|-----|-----|-----|
1 38.968 MM 1.2217 8.09261e5 1.10397e4 99.60392
2 39.885 MM 0.5416 3218.03003 99.02280 0.39608
Totals : 8.12479e5 1.11387e4
    
```

Results obtained with enhanced integrator!

\*\*\* End of Report \*\*\*

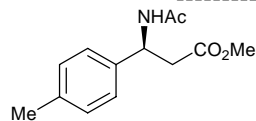

6b

Instrument 1 12/25/2009 9:32:07 PM hcj

Page 1 of 1

Data File C:\HPCHEM\1\DATA\HJD\08042212.D

Sample Name: 0420-2xxt

Data File C:\HPCHEM\1\DATA\HJD\08042208.D

Sample Name: 0420-2

```

=====
Injection Date : 4/25/2008 2:29:55 AM
Sample Name    : 0420-2xxt                Location : Vial 1
Acq. Operator  : hjd                      Inj Volume : Manually

Acq. Method    : C:\HPCHEM\1\METHODS\DEF GCL.M
Last changed   : 4/24/2008 9:21:49 PM by hjd
                (modified after loading)
Analysis Method: C:\HPCHEM\1\METHODS\DEF GCL.M
Last changed   : 12/25/2009 9:32:08 PM by hcj
                (modified after loading)
    
```

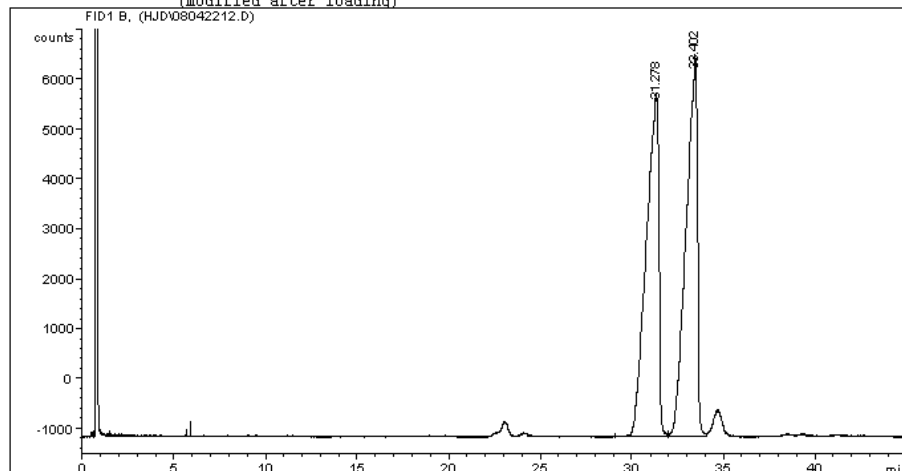

```

=====
Area Percent Report
=====
Sorted By      :      Signal
Multiplier     :      1.0000
Dilution       :      1.0000
    
```

```

Signal 1: FID1 B,
Peak RetTime Type Width Area Height Area
# [min] [min] [min] counts*s [counts] %
-----|-----|-----|-----|-----|
1 31.278 VV 0.7480 3.27507e5 6680.05664 49.92704
2 33.402 VV 0.6792 3.28464e5 7381.09229 50.07296
Totals :                6.55971e5 1.40611e4
    
```

Results obtained with enhanced integrator!

\*\*\* End of Report \*\*\*

Instrument 1 12/25/2009 9:35:13 PM hcj

```

=====
Injection Date : 4/24/2008 9:11:17 AM
Sample Name    : 0420-2                Location : Vial 1
Acq. Operator  : hjd                      Inj Volume : Manually

Acq. Method    : C:\HPCHEM\1\METHODS\DEF GCL.M
Last changed   : 4/24/2008 9:08:14 AM by hjd
                (modified after loading)
Analysis Method: C:\HPCHEM\1\METHODS\DEF GCL.M
Last changed   : 12/25/2009 9:35:14 PM by hcj
                (modified after loading)
    
```

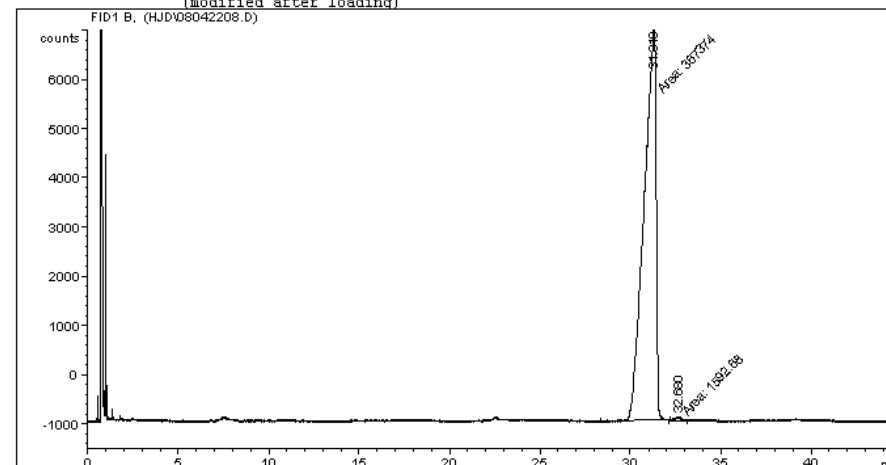

```

=====
Area Percent Report
=====
Sorted By      :      Signal
Multiplier     :      1.0000
Dilution       :      1.0000
    
```

```

Signal 1: FID1 B,
Peak RetTime Type Width Area Height Area
# [min] [min] [min] counts*s [counts] %
-----|-----|-----|-----|-----|
1 31.310 MM 0.7486 3.67374e5 8179.60938 99.56834
2 32.680 MM 0.4853 1592.67651 54.69570 0.43166
    
```

Totals : 3.68966e5 8234.30508

Results obtained with enhanced integrator!

\*\*\* End of Report \*\*\*

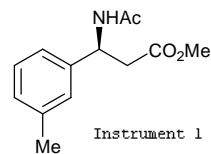

Page 1 of 1

Instrument 1 12/25/2009 9:38:27 PM hcj

6c

Page 1 of 1

Data File C:\HPCHEM\1\DATA\HJD\08030601.D

Sample Name: 4-CH3 xxt

160,10psi

=====  
Injection Date : 3/6/2008 9:03:14 PM  
Sample Name : 4-CH3 xxt Location : Vial 1  
Acq. Operator : hjd Inj Volume : Manually  
Acq. Method : C:\HPCHEM\1\METHODS\DEF GCL.M  
Last changed : 3/6/2008 10:10:05 PM by hjd  
(modified after loading)  
Analysis Method : C:\HPCHEM\1\METHODS\DEF GCL.M  
Last changed : 12/25/2009 9:42:16 PM by hcj  
(modified after loading)

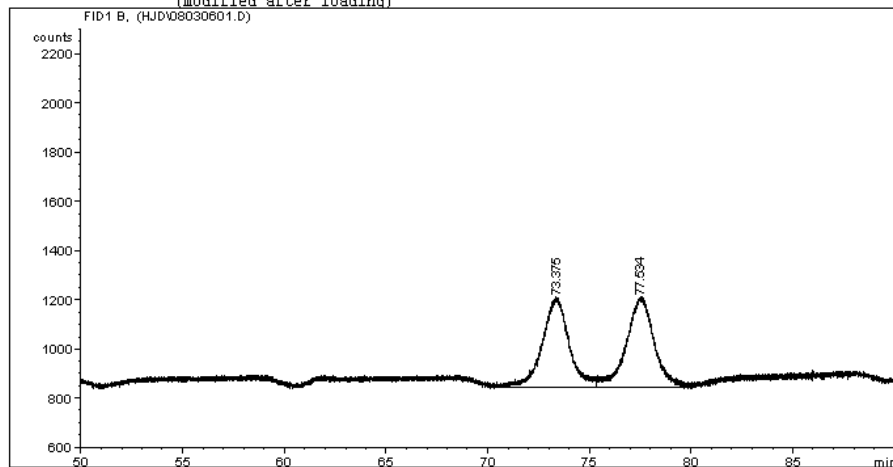

=====  
Area Percent Report  
=====

Sorted By : Signal  
Multiplier : 1.0000  
Dilution : 1.0000

Signal 1: FID1 B,

| Peak # | RetTime [min] | Type | Width [min] | Area counts*s | Height [counts] | Area %   |
|--------|---------------|------|-------------|---------------|-----------------|----------|
| 1      | 73.375        | VV   | 1.4207      | 3.38077e4     | 358.35187       | 49.56327 |
| 2      | 77.534        | VV   | 1.4450      | 3.44035e4     | 356.76950       | 50.43673 |

Totals : 6.82112e4 715.12137

Results obtained with enhanced integrator!

=====  
\*\*\* End of Report \*\*\*

Instrument 1 12/25/2009 9:42:44 PM hcj

Page 1 of 1

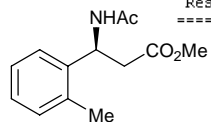

6d

Data File C:\HPCHEM\1\DATA\HJD\08030602.D

Sample Name: 2-CH3

160,10psi

=====  
Injection Date : 3/6/2008 10:44:49 PM  
Sample Name : 2-CH3 Location : Vial 1  
Acq. Operator : hjd Inj Volume : Manually  
Acq. Method : C:\HPCHEM\1\METHODS\DEF GCL.M  
Last changed : 3/6/2008 10:10:05 PM by hjd  
(modified after loading)  
Analysis Method : C:\HPCHEM\1\METHODS\DEF GCL.M  
Last changed : 12/25/2009 9:42:45 PM by hcj  
(modified after loading)

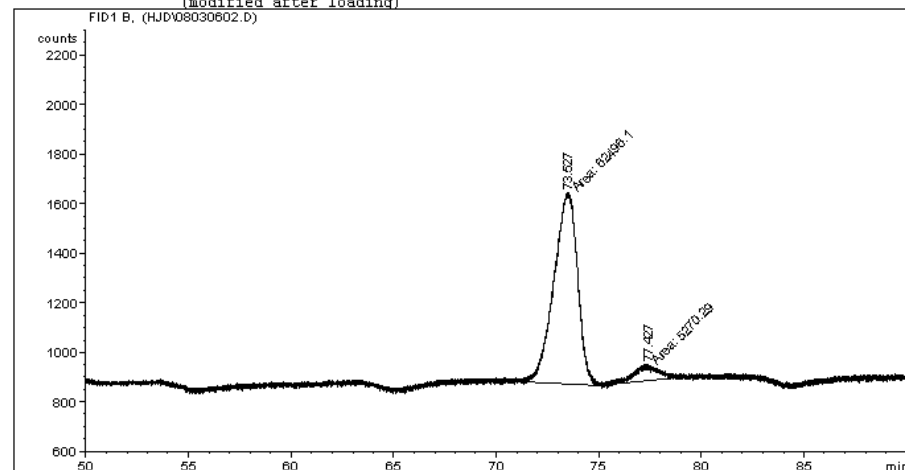

=====  
Area Percent Report  
=====

Sorted By : Signal  
Multiplier : 1.0000  
Dilution : 1.0000

Signal 1: FID1 B,

| Peak # | RetTime [min] | Type | Width [min] | Area counts*s | Height [counts] | Area %   |
|--------|---------------|------|-------------|---------------|-----------------|----------|
| 1      | 73.527        | MM   | 1.3598      | 6.24961e4     | 765.99634       | 92.22285 |
| 2      | 77.427        | MM   | 1.5413      | 5270.29004    | 56.98990        | 7.77715  |

Totals : 6.77664e4 822.98624

Results obtained with enhanced integrator!

=====  
\*\*\* End of Report \*\*\*

Instrument 1 12/25/2009 9:46:11 PM hcj

Page 1 of 1

Data File C:\HPCHEM\1\DATA\HJD\08042216.D

Sample Name: 0420-8xxt

Data File C:\HPCHEM\1\DATA\HJD\08042206.D

Sample Name: 0420-8

=====  
 Injection Date : 4/25/2008 7:07:01 AM Location : Vial 1  
 Sample Name : 0420-8xxt  
 Acq. Operator : hjd Inj Volume : Manually  
 Acq. Method : C:\HPCHEM\1\METHODS\DEF GC1.M  
 Last changed : 4/25/2008 7:05:32 AM by hjd  
 (modified after loading)  
 Analysis Method : C:\HPCHEM\1\METHODS\DEF GC1.M  
 Last changed : 12/25/2009 9:52:27 PM by hcj  
 (modified after loading)

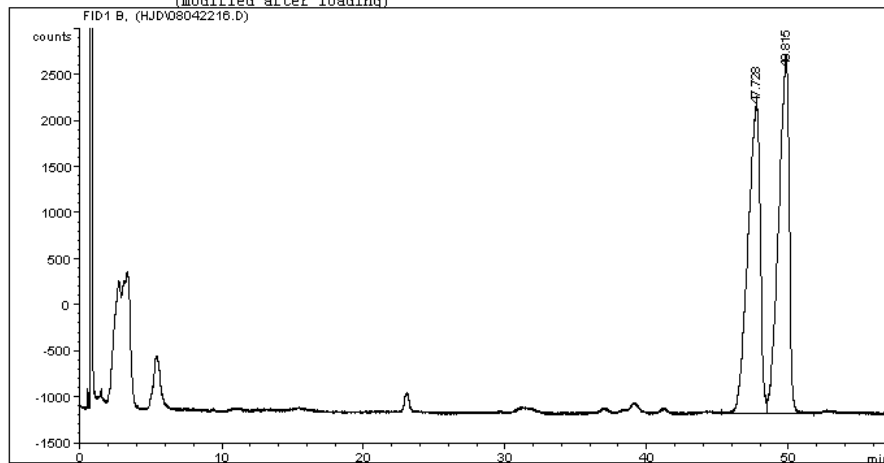

=====  
 Area Percent Report  
 =====  
 Sorted By : Signal  
 Multiplier : 1.0000  
 Dilution : 1.0000

Signal 1: FID1 B,  

| Peak # | RetTime [min] | Type | Width [min] | Area counts*s | Height [counts] | Area %   |
|--------|---------------|------|-------------|---------------|-----------------|----------|
| 1      | 47.728        | VV   | 0.9841      | 2.02987e5     | 3325.58740      | 50.05802 |
| 2      | 49.615        | VV   | 0.7997      | 2.02517e5     | 3868.12378      | 49.94198 |

Totals : 4.05504e5 7213.71118

Results obtained with enhanced integrator!

\*\*\* End of Report \*\*\*

Instrument 1 12/25/2009 9:56:05 PM hcj

=====  
 Injection Date : 4/24/2008 5:06:06 AM Location : Vial 1  
 Sample Name : 0420-8  
 Acq. Operator : hjd Inj Volume : Manually  
 Acq. Method : C:\HPCHEM\1\METHODS\DEF GC1.M  
 Last changed : 4/24/2008 3:49:15 AM by hjd  
 (modified after loading)  
 Analysis Method : C:\HPCHEM\1\METHODS\DEF GC1.M  
 Last changed : 12/25/2009 9:56:06 PM by hcj  
 (modified after loading)

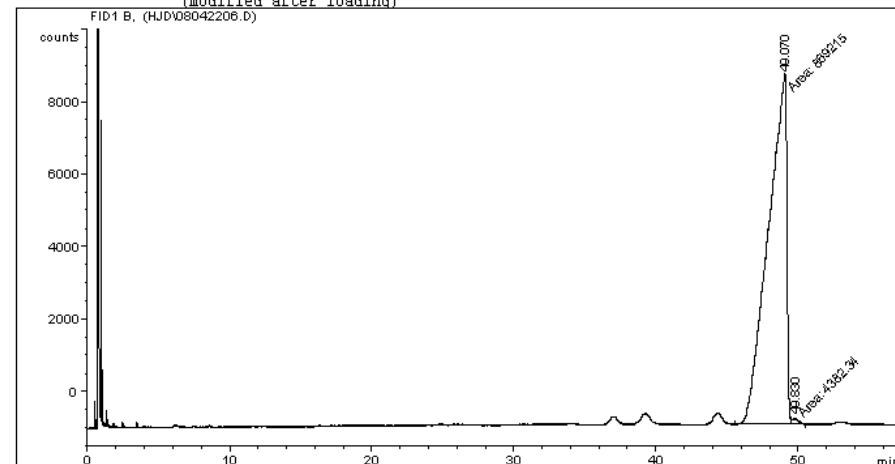

=====  
 Area Percent Report  
 =====  
 Sorted By : Signal  
 Multiplier : 1.0000  
 Dilution : 1.0000

Signal 1: FID1 B,  

| Peak # | RetTime [min] | Type | Width [min] | Area counts*s | Height [counts] | Area %   |
|--------|---------------|------|-------------|---------------|-----------------|----------|
| 1      | 49.070        | MF   | 1.5058      | 8.69215e5     | 9621.00586      | 99.49836 |
| 2      | 49.830        | FM   | 0.5204      | 4382.34473    | 140.35803       | 0.50164  |

Totals : 8.73597e5 9761.36389

Results obtained with enhanced integrator!

\*\*\* End of Report \*\*\*

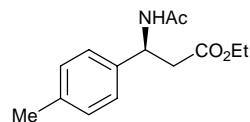

Page 1 of 1

Instrument 1 12/25/2009 9:59:50 PM hcj

Page 1 of 1

Data File C:\HPCHEM\2\DATA\HJD\08042313.D

Sample Name: 0420-4XXT

AD-H,90:10 230nm

-----  
 Injection Date : 4/24/2008 3:58:53 PM  
 Sample Name : 0420-4XXT Location : Vial 1  
 Acq. Operator : HJD  
 Acq. Method : C:\HPCHEM\2\METHODS\DZC-P.M  
 Last changed : 4/24/2008 3:40:30 PM by HJD  
 (modified after loading)  
 Analysis Method : C:\HPCHEM\2\METHODS\DEF1 LC.M  
 Last changed : 12/16/2009 3:23:24 PM by zc

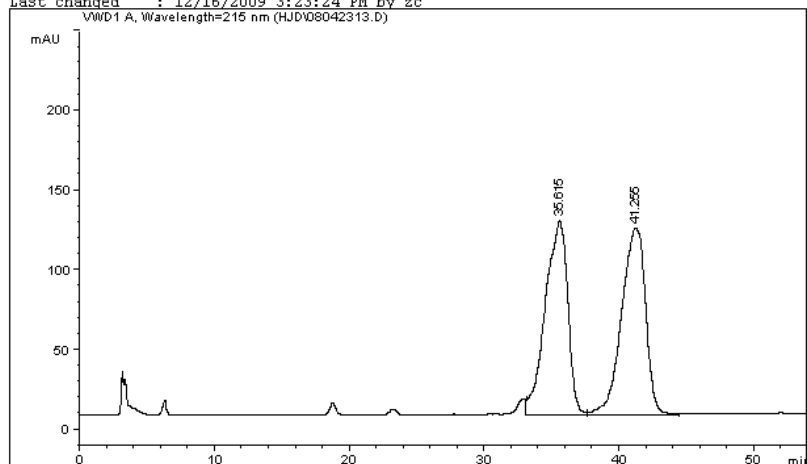

-----  
 Area Percent Report  
 -----

Sorted By : Signal  
 Multiplier : 1.0000  
 Dilution : 1.0000

Signal 1: VWD1 A, Wavelength=215 nm

| Peak # | RetTime [min] | Type | Width [min] | Area mAU  | %s | Height [mAU] | Area %  |
|--------|---------------|------|-------------|-----------|----|--------------|---------|
| 1      | 35.615        | VV   | 1.5964      | 1.41891e4 |    | 122.20000    | 49.1237 |
| 2      | 41.255        | VB   | 1.6171      | 1.46953e4 |    | 117.43892    | 50.8763 |

Totals : 2.88844e4 239.63892

Results obtained with enhanced integrator!

\*\*\* End of Report \*\*\*

Data File C:\HPCHEM\2\DATA\HJD\08042307.D

Sample Name: 0420-4

AD-H,90:10 230nm

-----  
 Injection Date : 4/23/2008 9:01:08 PM  
 Sample Name : 0420-4 Location : Vial 1  
 Acq. Operator : HJD  
 Acq. Method : C:\HPCHEM\2\METHODS\DZC-P.M  
 Last changed : 4/23/2008 9:53:55 PM by HJD  
 (modified after loading)  
 Analysis Method : C:\HPCHEM\2\METHODS\DEF1 LC.M  
 Last changed : 12/25/2009 11:15:13 AM by zc  
 (modified after loading)

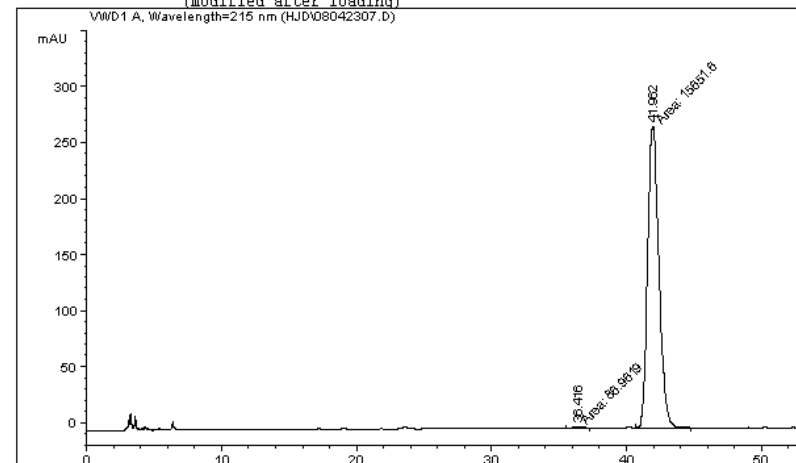

-----  
 Area Percent Report  
 -----

Sorted By : Signal  
 Multiplier : 1.0000  
 Dilution : 1.0000

Signal 1: VWD1 A, Wavelength=215 nm

| Peak # | RetTime [min] | Type | Width [min] | Area mAU  | %s | Height [mAU] | Area %  |
|--------|---------------|------|-------------|-----------|----|--------------|---------|
| 1      | 36.416        | MM   | 0.8268      | 86.96188  |    | 1.75292      | 0.5525  |
| 2      | 41.962        | MM   | 0.9689      | 1.56516e4 |    | 269.22040    | 99.4475 |

Totals : 1.57385e4 270.97332

Results obtained with enhanced integrator!

\*\*\* End of Report \*\*\*

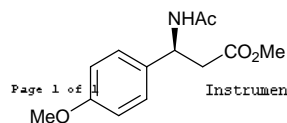

Data File C:\HPCHEM\2\DATA\HJD\08042310.D

Sample Name: 0420-5xxt

AD-H,90:10 230nm

=====  
Injection Date : 4/24/2008 12:22:46 PM  
Sample Name : 0420-5xxt Location : Vial 1  
Acq. Operator : HJD  
Acq. Method : C:\HPCHEM\2\METHODS\DZC-P.M  
Last changed : 4/24/2008 9:38:18 AM by HJD  
(modified after loading)  
Analysis Method : C:\HPCHEM\2\METHODS\DEF1 LC.M  
Last changed : 12/25/2009 11:16:05 AM by zc  
(modified after loading)  
=====

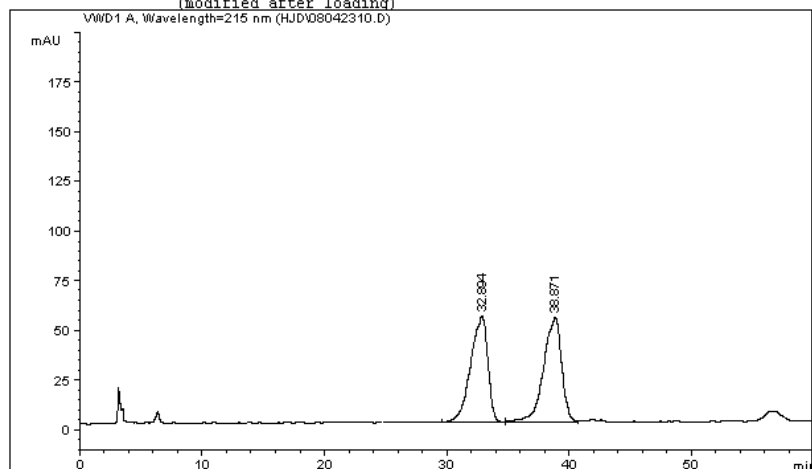

=====  
Area Percent Report  
=====

Sorted By : Signal  
Multiplier : 1.0000  
Dilution : 1.0000

Signal 1: VWD1 A, Wavelength=215 nm

| Peak # | RetTime [min] | Type | Width [min] | Area mAU*s | Height [mAU] | Area %  |
|--------|---------------|------|-------------|------------|--------------|---------|
| 1      | 32.894        | BV   | 1.3329      | 5245.17871 | 53.23633     | 49.1091 |
| 2      | 38.871        | VV   | 1.3948      | 5435.49658 | 52.60138     | 50.8909 |

Totals : 1.06807e4 105.83771

Results obtained with enhanced integrator!

=====  
\*\*\* End of Report \*\*\*

Instrument 2 12/25/2009 11:18:04 AM zc

Data File C:\HPCHEM\2\DATA\HJD\08042309.D

Sample Name: 0420-5

AD-H,90:10 230nm

=====  
Injection Date : 4/24/2008 10:35:23 AM  
Sample Name : 0420-5 Location : Vial 1  
Acq. Operator : HJD  
Acq. Method : C:\HPCHEM\2\METHODS\DZC-P.M  
Last changed : 4/24/2008 9:38:18 AM by HJD  
(modified after loading)  
Analysis Method : C:\HPCHEM\2\METHODS\DEF1 LC.M  
Last changed : 12/25/2009 11:18:05 AM by zc  
(modified after loading)  
=====

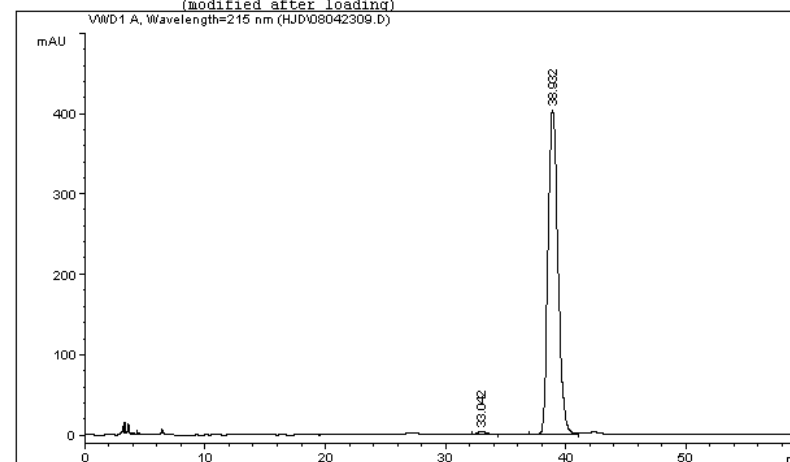

=====  
Area Percent Report  
=====

Sorted By : Signal  
Multiplier : 1.0000  
Dilution : 1.0000

Signal 1: VWD1 A, Wavelength=215 nm

| Peak # | RetTime [min] | Type | Width [min] | Area mAU*s | Height [mAU] | Area %  |
|--------|---------------|------|-------------|------------|--------------|---------|
| 1      | 33.042        | BP   | 0.7106      | 152.37654  | 3.22963      | 0.6545  |
| 2      | 38.932        | VV   | 0.8912      | 2.31279e4  | 402.77917    | 99.3455 |

Totals : 2.32802e4 406.00880

Results obtained with enhanced integrator!

=====  
\*\*\* End of Report \*\*\*

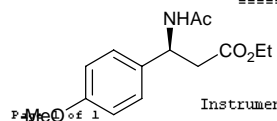

6g

Instrument 2 12/25/2009 11:20:40 AM zc

Page 1 of 1



Data File C:\HPCHEM\2\DATA\HJD\08042312.D

Sample Name: 0420-6xxt

AD-H,90:10 230nm

=====  
Injection Date : 4/24/2008 3:07:02 PM  
Sample Name : 0420-6xxt Location : Vial 1  
Acq. Operator : HJD  
Acq. Method : C:\HPCHEM\2\METHODS\D2C-P.M  
Last changed : 4/24/2008 3:40:30 PM by HJD  
(modified after loading)  
Analysis Method : C:\HPCHEM\2\METHODS\DEF1.LC.M  
Last changed : 12/25/2009 11:20:41 AM by zc  
(modified after loading)  
=====

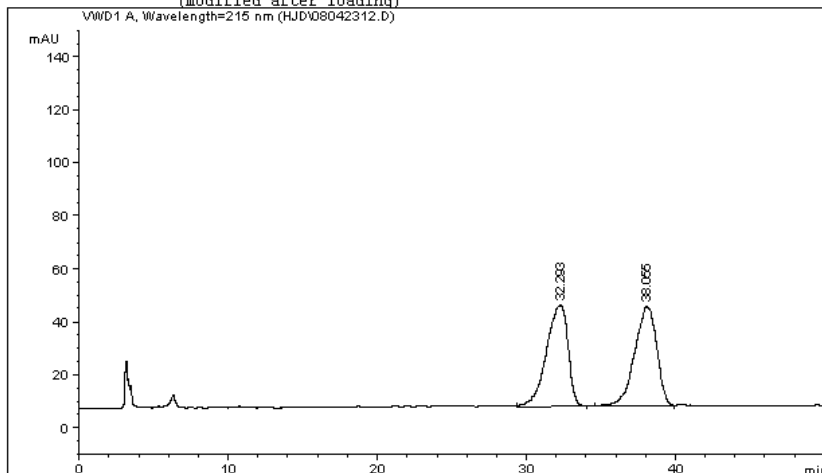

=====  
Area Percent Report  
=====

Sorted By : Signal  
Multiplier : 1.0000  
Dilution : 1.0000

Signal 1: VWD1 A, Wavelength=215 nm

| Peak # | RetTime [min] | Type | Width [min] | Area mAU*s | Height [mAU] | Area %  |
|--------|---------------|------|-------------|------------|--------------|---------|
| 1      | 32.293        | VV   | 1.4289      | 3869.19189 | 38.21138     | 49.8653 |
| 2      | 38.055        | VV   | 1.3954      | 3890.09155 | 37.53797     | 50.1347 |

Totals : 7759.28345 75.74934

Results obtained with enhanced integrator!

=====  
\*\*\* End of Report \*\*\*

Instrument 2 12/25/2009 11:22:35 AM zc

Data File C:\HPCHEM\2\DATA\HJD\08042311.D

Sample Name: 0420-6xxt

AD-H,90:10 230nm

=====  
Injection Date : 4/24/2008 2:07:50 PM  
Sample Name : 0420-6xxt Location : Vial 1  
Acq. Operator : HJD  
Acq. Method : C:\HPCHEM\2\METHODS\D2C-P.M  
Last changed : 4/24/2008 9:38:18 AM by HJD  
(modified after loading)  
Analysis Method : C:\HPCHEM\2\METHODS\DEF1.LC.M  
Last changed : 12/25/2009 11:24:39 AM by zc  
(modified after loading)  
=====

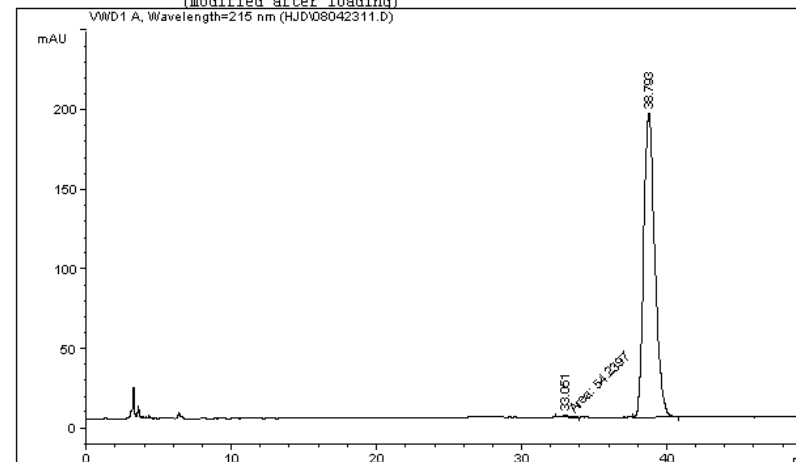

=====  
Area Percent Report  
=====

Sorted By : Signal  
Multiplier : 1.0000  
Dilution : 1.0000

Signal 1: VWD1 A, Wavelength=215 nm

| Peak # | RetTime [min] | Type | Width [min] | Area mAU*s | Height [mAU] | Area %  |
|--------|---------------|------|-------------|------------|--------------|---------|
| 1      | 33.051        | MM   | 0.7036      | 54.23972   | 1.28475      | 0.5283  |
| 2      | 38.793        | VB   | 0.8022      | 1.02124e4  | 190.76672    | 99.4717 |

Totals : 1.02666e4 192.05148

Results obtained with enhanced integrator!

=====  
\*\*\* End of Report \*\*\*

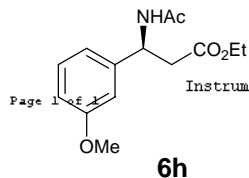

Instrument 2 12/25/2009 11:25:07 AM zc

Page 1 of 1

Data File C:\HPCHEM\1\DATA\HJD\08030508.D

Sample Name: 4-Cl xxt

160,10psi

=====  
 Injection Date : 3/6/2008 7:38:04 AM  
 Sample Name : 4-Cl xxt Location : Vial 1  
 Acq. Operator : hjd Inj Volume : Manually  
 Acq. Method : C:\HPCHEM\1\METHODS\DEF GC1.M  
 Last changed : 3/6/2008 4:36:19 AM by hjd  
 (modified after loading)  
 Analysis Method : C:\HPCHEM\1\METHODS\DEF GC1.M  
 Last changed : 12/25/2009 10:08:43 PM by hcj  
 (modified after loading)

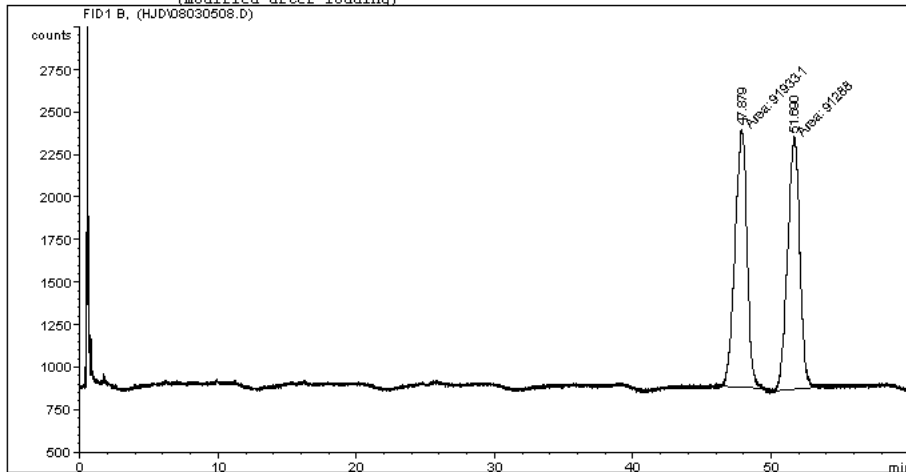

=====  
 Area Percent Report  
 =====

Sorted By : Signal  
 Multiplier : 1.0000  
 Dilution : 1.0000

Signal 1: FID1 B,

| Peak # | RetTime [min] | Type | Width [min] | Area counts*s | Height [counts] | Area %   |
|--------|---------------|------|-------------|---------------|-----------------|----------|
| 1      | 47.879        | MM   | 1.0138      | 9.19331e4     | 1511.39600      | 50.17605 |
| 2      | 51.690        | MM   | 1.0320      | 9.12880e4     | 1474.31091      | 49.82395 |

Totals : 1.83221e5 2985.70691

Results obtained with enhanced integrator!

=====  
 \*\*\* End of Report \*\*\*

Data File C:\HPCHEM\1\DATA\HJD\08030506.D

Sample Name: 4-Cl

160,10psi

=====  
 Injection Date : 3/6/2008 4:34:39 AM  
 Sample Name : 4-Cl Location : Vial 1  
 Acq. Operator : hjd Inj Volume : Manually  
 Acq. Method : C:\HPCHEM\1\METHODS\DEF GC1.M  
 Last changed : 3/6/2008 4:36:19 AM by hjd  
 (modified after loading)  
 Analysis Method : C:\HPCHEM\1\METHODS\DEF GC1.M  
 Last changed : 12/25/2009 10:11:35 PM by hcj  
 (modified after loading)

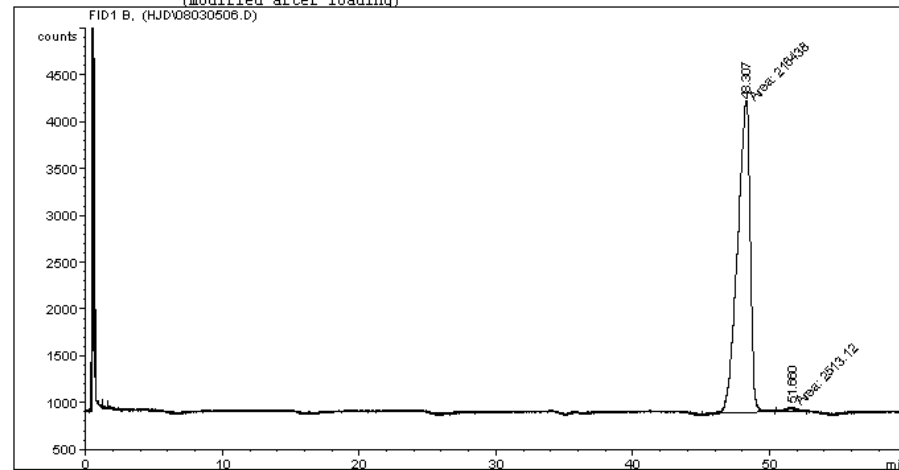

=====  
 Area Percent Report  
 =====

Sorted By : Signal  
 Multiplier : 1.0000  
 Dilution : 1.0000

Signal 1: FID1 B,

| Peak # | RetTime [min] | Type | Width [min] | Area counts*s | Height [counts] | Area %   |
|--------|---------------|------|-------------|---------------|-----------------|----------|
| 1      | 48.307        | MM   | 1.0918      | 2.16438e5     | 3304.12085      | 98.85220 |
| 2      | 51.660        | MM   | 1.0846      | 2513.11646    | 38.61885        | 1.14780  |

Totals : 2.18951e5 3342.73970

Results obtained with enhanced integrator!

=====  
 \*\*\* End of Report \*\*\*

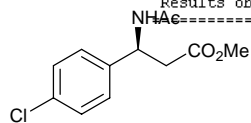

Data File C:\HPCHEM\1\DATA\HJD\08042217.D

Sample Name: 0420-7xxt

Data File C:\HPCHEM\1\DATA\HJD\08042211.D

Sample Name: 0420-lxxt

```

=====
Injection Date : 4/25/2008 9:04:19 PM
Sample Name    : 0420-7xxt                Location : Vial 1
Acq. Operator  : hjd                      Inj Volume : Manually

Acq. Method    : C:\HPCHEM\1\METHODS\DEF GC1.M
Last changed   : 4/25/2008 8:46:47 PM by hjd
                (modified after loading)
Analysis Method : C:\HPCHEM\1\METHODS\DEF GC1.M
Last changed   : 12/25/2009 9:49:21 PM by hcj
                (modified after loading)
    
```

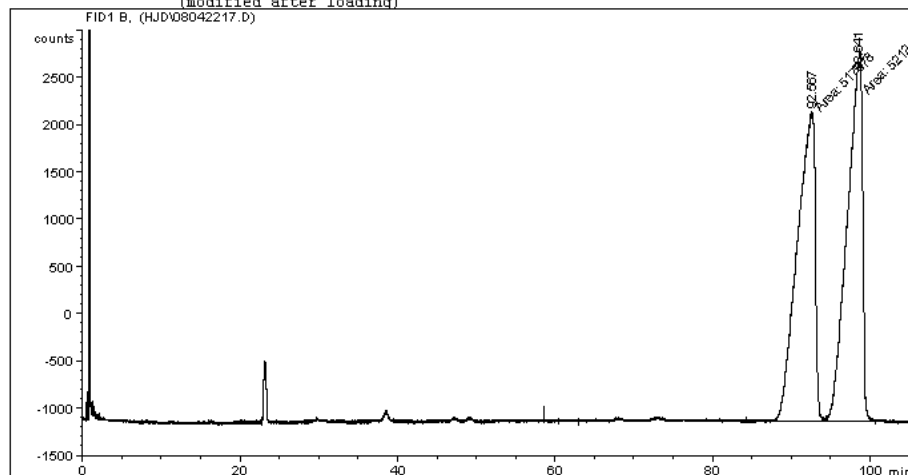

=====  
Area Percent Report  
=====

```

Sorted By      :      Signal
Multiplier     :      1.0000
Dilution       :      1.0000
    
```

Signal 1: FID1 B,

| Peak # | RetTime [min] | Type | Width [min] | Area counts*s | Height [counts] | Area %   |
|--------|---------------|------|-------------|---------------|-----------------|----------|
| 1      | 92.567        | MM   | 2.6524      | 5.17678e5     | 3252.91260      | 49.83003 |
| 2      | 98.641        | MM   | 2.2205      | 5.21209e5     | 3912.09985      | 50.16997 |

Totals : 1.03889e6 7165.01245

Results obtained with enhanced integrator!

\*\*\* End of Report \*\*\*

Instrument 1 12/25/2009 9:50:12 PM hcj

```

=====
Injection Date : 4/24/2008 11:39:30 PM
Sample Name    : 0420-lxxt                Location : Vial 1
Acq. Operator  : hjd                      Inj Volume : Manually

Acq. Method    : C:\HPCHEM\1\METHODS\DEF GC1.M
Last changed   : 4/24/2008 9:21:49 PM by hjd
                (modified after loading)
Analysis Method : C:\HPCHEM\1\METHODS\DEF GC1.M
Last changed   : 12/25/2009 9:50:13 PM by hcj
                (modified after loading)
    
```

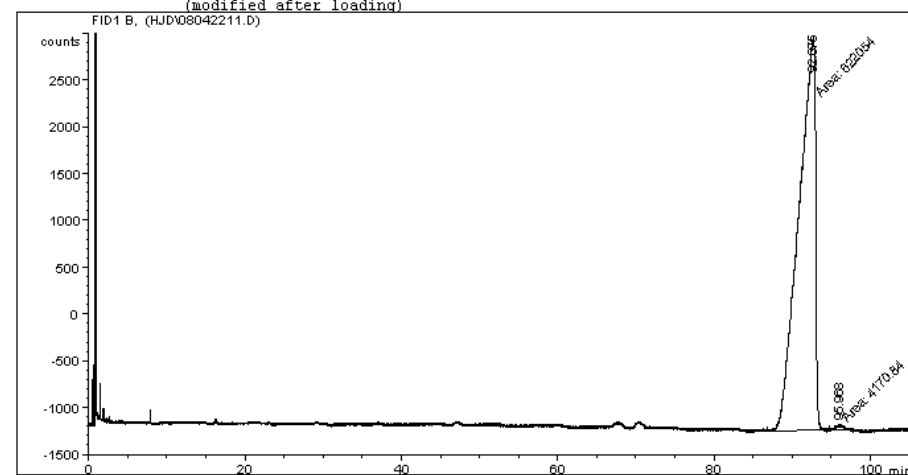

=====  
Area Percent Report  
=====

```

Sorted By      :      Signal
Multiplier     :      1.0000
Dilution       :      1.0000
    
```

Signal 1: FID1 B,

| Peak # | RetTime [min] | Type | Width [min] | Area counts*s | Height [counts] | Area %   |
|--------|---------------|------|-------------|---------------|-----------------|----------|
| 1      | 92.675        | MM   | 2.4698      | 6.22054e5     | 4197.69092      | 99.33397 |
| 2      | 95.968        | MM   | 1.2924      | 4170.83740    | 61.50812        | 0.66603  |

Totals : 6.26225e5 4259.19904

Results obtained with enhanced integrator!

\*\*\* End of Report \*\*\*

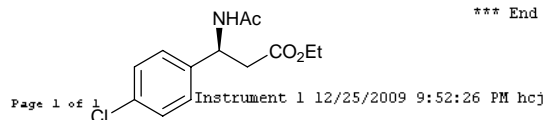

Data File C:\HPCHEM\1\DATA\HJD\08030505.D

Sample Name: 4-Fxxt

160,10psi

=====  
Injection Date : 3/6/2008 3:54:12 AM  
Sample Name : 4-Fxxt Location : Vial 1  
Acq. Operator : hjd Inj Volume : Manually  
Acq. Method : C:\HPCHEM\1\METHODS\DEF GC1.M  
Last changed : 3/6/2008 3:18:06 AM by hjd  
(modified after loading)  
Analysis Method : C:\HPCHEM\1\METHODS\DEF GC1.M  
Last changed : 12/25/2009 9:59:51 PM by hcj  
(modified after loading)  
=====

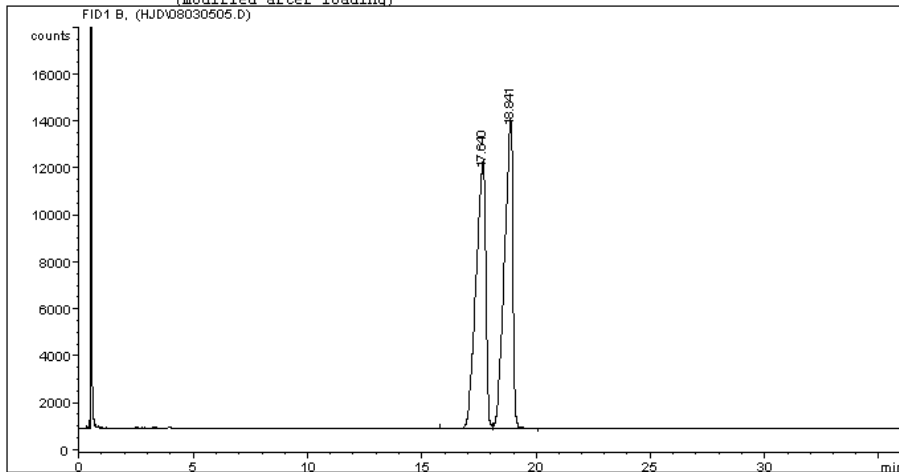

=====  
Area Percent Report  
=====

Sorted By : Signal  
Multiplier : 1.0000  
Dilution : 1.0000

Signal 1: FID1 B,

| Peak # | RetTime [min] | Type | Width [min] | Area counts*s | Height [counts] | Area %   |
|--------|---------------|------|-------------|---------------|-----------------|----------|
| 1      | 17.640        | VV   | 0.4953      | 3.42831e5     | 1.08889e4       | 50.02874 |
| 2      | 18.841        | VV   | 0.4253      | 3.42437e5     | 1.27506e4       | 49.97126 |

Totals : 6.85268e5 2.36395e4

Results obtained with enhanced integrator!

=====  
\*\*\* End of Report \*\*\*

Instrument 1 12/25/2009 10:03:41 PM hcj

Data File C:\HPCHEM\1\DATA\HJD\08030503.D

Sample Name: 4-F

160,10psi

=====  
Injection Date : 3/6/2008 2:51:42 AM  
Sample Name : 4-F Location : Vial 1  
Acq. Operator : hjd Inj Volume : Manually  
Acq. Method : C:\HPCHEM\1\METHODS\DEF GC1.M  
Last changed : 3/6/2008 12:49:57 AM by hjd  
(modified after loading)  
Analysis Method : C:\HPCHEM\1\METHODS\DEF GC1.M  
Last changed : 12/25/2009 10:07:45 PM by hcj  
(modified after loading)  
=====

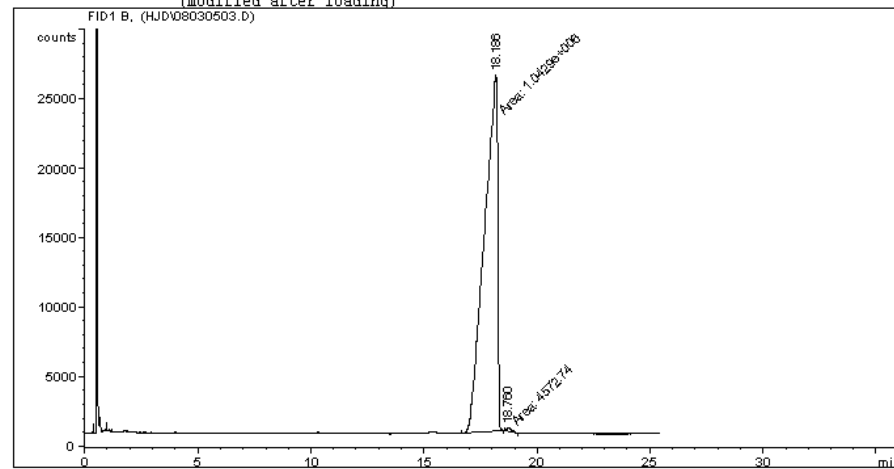

=====  
Area Percent Report  
=====

Sorted By : Signal  
Multiplier : 1.0000  
Dilution : 1.0000

Signal 1: FID1 B,

| Peak # | RetTime [min] | Type | Width [min] | Area counts*s | Height [counts] | Area %   |
|--------|---------------|------|-------------|---------------|-----------------|----------|
| 1      | 18.186        | MM   | 0.6791      | 1.04290e6     | 2.55967e4       | 99.56345 |
| 2      | 18.760        | MM   | 0.2598      | 4572.73682    | 293.32980       | 0.43655  |

Totals : 1.04747e6 2.58900e4

Results obtained with enhanced integrator!

=====  
\*\*\* End of Report \*\*\*

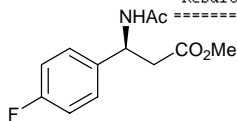

Page 1 of 1

6k

Instrument 1 12/25/2009 10:08:42 PM hcj

Page 1 of 1

Data File C:\HPCHEM\1\DATA\HJD\06052905.D

Sample Name: B-3

B-390,130 C, 15spi

=====  
 Injection Date : 5/31/2006 2:57:40 PM  
 Sample Name : B-3 Location : Vial 1  
 Acq. Operator : WDY Inj Volume : Manually  
 Acq. Method : C:\HPCHEM\1\METHODS\DEF GC1.M  
 Last changed : 5/31/2006 2:29:33 PM by WDY  
 (modified after loading)  
 Analysis Method : C:\HPCHEM\1\METHODS\DEF GC1.M  
 Last changed : 12/26/2009 2:12:58 AM by hcj  
 (modified after loading)

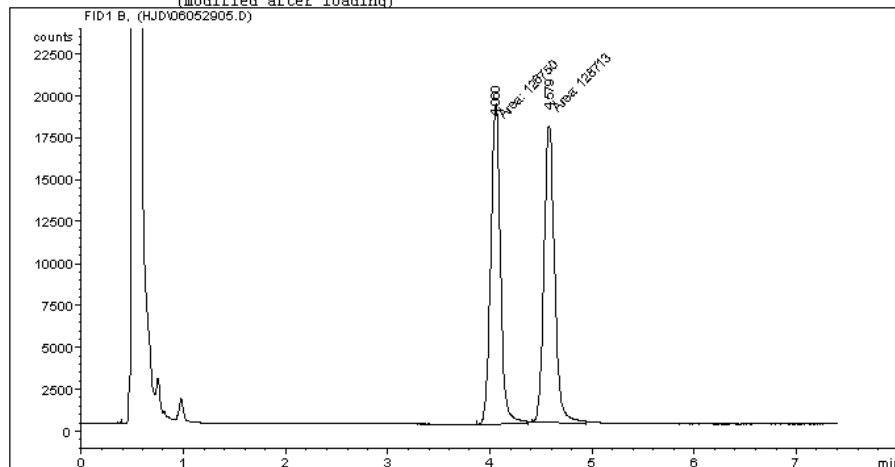

=====  
 Area Percent Report  
 =====

Sorted By : Signal  
 Multiplier : 1.0000  
 Dilution : 1.0000

Signal 1: FID1 B,

| Peak # | RetTime [min] | Type | Width [min] | Area counts*s | Height [counts] | Area %   |
|--------|---------------|------|-------------|---------------|-----------------|----------|
| 1      | 4.060         | MM   | 0.1166      | 1.26750e5     | 1.81169e4       | 49.61575 |
| 2      | 4.579         | MM   | 0.1166      | 1.28713e5     | 1.83987e4       | 50.38425 |

Totals : 2.55462e5 3.65156e4

Results obtained with enhanced integrator!

=====  
 \*\*\* End of Report \*\*\*

Instrument 1 12/26/2009 2:13:21 AM hcj

Page 1 of 1

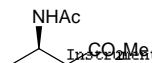

8

Data File C:\HPCHEM\1\DATA\HJD\06053106.D

Sample Name: A-4

B-390,130 C, 15spi

=====  
 Injection Date : 5/31/2006 3:36:54 PM  
 Sample Name : A-4 Location : Vial 1  
 Acq. Operator : WDY Inj Volume : Manually  
 Acq. Method : C:\HPCHEM\1\METHODS\DEF GC1.M  
 Last changed : 5/31/2006 2:29:33 PM by WDY  
 (modified after loading)  
 Analysis Method : C:\HPCHEM\1\METHODS\DEF GC1.M  
 Last changed : 12/26/2009 2:18:14 AM by hcj  
 (modified after loading)

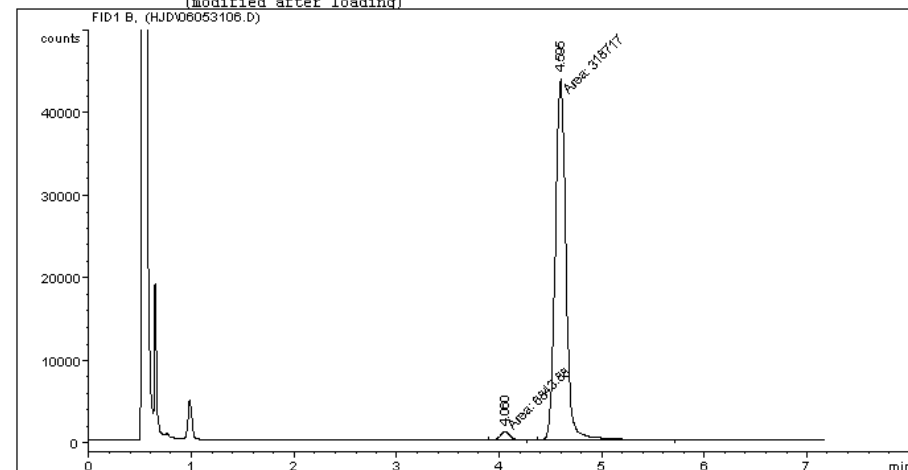

=====  
 Area Percent Report  
 =====

Sorted By : Signal  
 Multiplier : 1.0000  
 Dilution : 1.0000

Signal 1: FID1 B,

| Peak # | RetTime [min] | Type | Width [min] | Area counts*s | Height [counts] | Area %   |
|--------|---------------|------|-------------|---------------|-----------------|----------|
| 1      | 4.060         | MM   | 0.1020      | 6843.87500    | 1117.74878      | 2.10218  |
| 2      | 4.595         | MM   | 0.1206      | 3.18717e5     | 4.40393e4       | 97.89782 |

Totals : 3.25560e5 4.51570e4

Results obtained with enhanced integrator!

=====  
 \*\*\* End of Report \*\*\*

Instrument 1 12/26/2009 2:18:32 AM hcj

Page 1 of 1

21
